# Supplementary material for: Characterisation and clinical impact of hypertransmission alterations in neovascular age-related macular degeneration using en face OCT
Source: Research Square preprint supplement (doi:10.21203/rs.3.rs-8223613/v1), 2025-12-30
Supplement: Supplementary file 1 [file 7a2354508a41dcd5d97fbeee.docx]

**Table 1.** Summary of descriptive statistics of the evaluated features.

| **Evaluated features** | **HTA absent  (*n* = 17)** | **All HTAs  (*n* = 119)** | **HTA present (*n* = 119)** | | |
| --- | --- | --- | --- | --- | --- |
| **Heterogeneous  (*n* = 30)** | **Homogeneous (*n* = 23)** | **Indeterminate  (*n* = 66)** |
| Mean (SD) BCVA, letters | 79 (6) | 62 (22) | 47 (18) | 64 (14) | 69 (17) |
| Mean (SD) age, years | 76 (6) | 79 (7) | 79 (8) | 82 (5) | 78 (6) |
| Female sex, n (%) | 10 (59) | 64 (54) | 15 (50) | 14 (61) | 35 (53) |
| Mean (SD) disease duration, months | 40 (40) | 45 (40) | 67 (48) | 54 (37) | 33 (33) |
| ERM presence, n (%) | 4 (24) | 10 (8) | 5 (17) | 0 (0) | 5 (8) |
| Number of patches, median (IQR) | NA | 1 (1–1) | 1 (1–1) | 2 (1–4) | 1 (1–1) |
| Mean (SD) sqrt of total HTA  area, mm | NA | 2.73 (1.12) | 3.39 (1.30) | 2.69 (1.17) | 2.45 (0.90) |
| Median (IQR) foveal proximity, mm | NA | −0.54  (−1.03, −0.02) | −0.66  (−1.44, −0.32) | −0.23  (−0.90, −0.09) | −0.49  (−0.91, −0.04) |
| Median (IQR) foveal involvement score at 0.5 mm, % | NA | 100  (61–100) | 100  (88–100) | 91  (31–100) | 100  (52–100) |
| Median (IQR) foveal involvement score at 1.0 mm, % | NA | 83  (49–100) | 98  (70–100) | 78  (41–96) | 81  (47–98) |
| Median (IQR) foveal involvement score at 1.5 mm, % | NA | 58  (38–91) | 84  (49–100) | 54  (39–87) | 58  (35–78) |
| Median (IQR) foveal involvement score at 2.0 mm, % | NA | 41  (27–70) | 64  (37–97) | 35  (24–72) | 41  (26–62) |
| Median (IQR) IRF volume, μm³a | 12.0  (12.0–12.0) | 12.0  (12.0–20.4) | 12.0  (12.0–19.9) | 19.5  (13.2–22.6) | 12.0  (12.0–20.0) |
| Median (IQR) SRF volume, μm³a | 18.7  (16.0–23.8) | 16.0  (16.0–23.6) | 16.0  (16.0–21.2) | 16.0  (16.0–16.0) | 20.9  (16.0–25.1) |
| Median (IQR) PED volume, μm³a | 24.2  (23.0–25.0) | 25.2 (24.1–25.8) | 25.4 (23.9–25.7) | 24.4 (23.1–25.2) | 25.4  (24.5–26.1) |
| Median (IQR) SHRM volume, μm³a | 17.6  (15.4–21.7) | 19.5  (13.4–22.2) | 21.2  (18.5–22.9) | 15.0  (13.4–21.2) | 19.2  (13.4–22.3) |

*BCVA* best-corrected visual acuity; *ERM* epiretinal membrane; *HTA* hypertransmission alteration; *IQR* interquartile range; *IRF* intraretinal fluid; *NA* not applicable; *PED* pigment epithelial detachment; *SD* standard deviation; *SHRM* subretinal hyperreflective material; *sqrt* square root; *SRF* subretinal fluid.

aThe volumes of IRF, SRF, PED, and SHRM were analysed in the central foveal subfield.
