# Supplementary material for: Characterisation and clinical impact of hypertransmission alterations in neovascular age-related macular degeneration using en face OCT
Source: Research Square preprint supplement (doi:10.21203/rs.3.rs-8223613/v1), 2025-12-30
Supplement: Supplementary file 1 [file a583f9209bdae81a5140c7a0.pdf]

**Table S1.** Percentage of complete captures of each ETDRS subfield on the included OCT scans

| <b>ETDRS subfield</b>            | <b>Complete captures on OCT images (%)</b> |
|----------------------------------|--------------------------------------------|
| Central (r = 0.5 mm)             | 100.00                                     |
| Inner ring (r = 1.5 mm)          | 100.00                                     |
| Modified outer ring (r = 2 mm)   | 98.32                                      |
| Modified outer ring (r = 2.5 mm) | 89.92                                      |
| Outer ring (r = 3 mm)            | 3.36                                       |

*ETDRS* Early Treatment Diabetic Retinopathy Study; *OCT* optical coherence tomography.
