# Supplementary material for: Characterisation and clinical impact of hypertransmission alterations in neovascular age-related macular degeneration using en face OCT
Source: Research Square preprint supplement (doi:10.21203/rs.3.rs-8223613/v1), 2025-12-30
Supplement: Supplementary file 2 [file 9df36e02bb25e1d7a3d913f4.docx]

**Table 2.** Univariate analysis of BCVA (ETDRS letters) associations with demographics, HTA phenotypes, quantitative metrics, and volumes of exudative pathologies.

| **Parameter** | **Category** | **Coefficient  (95% CI)** | **R2** | ***p* value** | **Adjusted *p* value** |
| --- | --- | --- | --- | --- | --- |
| Age, years |  | −0.64 (−1.17, −0.11) | 0.041 | 0.019 | 0.025 |
| Sex | Male | Reference | | | |
| Female | −10.68  (−17.78, −3.58) | 0.063 | 0.003 | 0.005 |
| Disease duration, days | | −0.04 (−0.13, 0.06) | 0.005 | 0.455 | 0.506 |
| Presence of ERM | | −4.25 (−16.16, 7.65) | 0.004 | 0.481 | 0.513 |
| HTA phenotype | Heterogeneous | Reference | 0.230 | < 0.001 | < 0.001 |
| Homogeneous | 17.14 (6.79, 27.49) |
| Indeterminate | 22.07 (13.82, 30.31) |
| Absent | 32.00 (20.19, 43.81) |
| Number of HTA patches | | −1.17 (−3.81, 1.47) | 0.007 | 0.383 | 0.471 |
| Sqrt of HTA size, mm | | −7.76 (−11.02, −4.49) | 0.161 | < 0.001 | < 0.001 |
| Foveal proximity, mm | | −9.32 (−14.13, −4.50) | 0.112 | < 0.001 | < 0.001 |
| Foveal involvement score at 0.5 mm, % | | −0.17 (−0.28, −0.06) | 0.077 | 0.002 | 0.004 |
| Foveal involvement score at 1.0 mm, % | | −0.20  (−0.32, −0.07) | 0.078 | 0.002 | 0.004 |
| Foveal involvement score at 1.5 mm, % | | −0.23 (−0.36, −0.10) | 0.094 | < 0.001 | 0.002 |
| Foveal involvement score at 2.0 mm, % | | −0.28 (−0.41, −0.14) | 0.127 | < 0.001 | < 0.001 |
| IRF volume, μm³a | | −1.45 (−2.13, −0.77) | 0.119 | < 0.001 | < 0.001 |
| SRF volume, μm³a | | 1.35 (0.50, 2.21) | 0.069 | 0.002 | 0.004 |
| PED volume, μm³a | | −0.25 (−2.30, 1.81) | 0.000 | 0.812 | 0.812 |
| SHRM volume, μm³a | | −1.06 (−1.92, −0.20) | 0.043 | 0.016 | 0.023 |

*BCVA* best-corrected visual acuity; *CI* confidence interval; *ERM* epiretinal membrane; *ETDRS* Early Treatment Diabetic Retinopathy Study; *HTA* hypertransmission alteration; *IRF* intraretinal fluid; *PED* pigment epithelial detachment; *SHRM* subretinal hyperreflective material; *sqrt* square root; *SRF* subretinal fluid.

aThe volumes of IRF, SRF, PED, and SHRM were analysed in the foveal central subfield, and log2 transformation was applied to reduce the skewness of the data.
