# Supplementary material for: Characterisation and clinical impact of hypertransmission alterations in neovascular age-related macular degeneration using en face OCT
Source: Research Square preprint supplement (doi:10.21203/rs.3.rs-8223613/v1), 2025-12-30
Supplement: Supplementary file 3 [file c34ed8395e164a9073a8ce14.docx]

**Supplementary Methods**

**SD-OCT image process – additional details**

Before generating en face OCT projections, histogram matching was performed on each B scan to remove dark line artefacts [1]. This technique adjusts the histogram of each B scan to match a reference histogram, thereby reducing artefacts and enhancing the overall image quality.

Median normalisation was performed to ensure the uniformity of measures for different features [2]. This process involved extracting the intensity values of all pixels in the en face OCT projection, calculating the median intensity value, and determining a normalisation factor by comparing the median intensity value of the current en face projection to a reference median value. Each pixel's intensity value was then adjusted by multiplying it by the normalisation factor, effectively moving the median of the histogram to the middle of the intensity span.

**Manual grading of HTAs and phenotypes**

For the scans that failed to centre, the correct foveal centre point was manually annotated and transposed to the en face image by an experienced ophthalmologist (S.Y.), by identifying the following landmarks: 1) a concave dip in the retina, 2) the absence of the inner layers of the retina, and 3) reflectance at the level of the internal limiting membrane [3,4].

The phenotype classifications were: (1) heterogeneous phenotype – lesions of heterogeneous hyperreflectivity with mostly ill-defined boundaries, associated with noncontinuous choroidal hypertransmission on B scans due to a complete atrophy of the outer nuclear layer (ONL), photoreceptor layers, and RPE layers, which are often located above SHRM or fibrovascular PED; (2) homogeneous phenotype – lesions of homogeneous hyperreflectivity with mostly well-defined boundaries, associated with continuous choroidal hypertransmission on OCT B scans due to a complete atrophy of the ONL, photoreceptor layers, and RPE layers, and (3) indeterminate phenotype – lesions of lower hyperreflectivity with ill-defined boundaries, associated with non-continuous choroidal hypertransmission on B scans due to an attenuation of the RPE and disruption of photoreceptor layers. For eyes with HTA patches of different phenotypes, the phenotype classification was determined by the HTA patch closest to the foveal centre.

**Quantitative metrics of HTAs – additional details**

Homogeneity was quantified as the angular second moment, which measures uniformity and texture smoothness of pixel intensities on the image [5]. Reflectivity was calculated as the mean of the pixel intensities. Delineation was quantified as the difference between the 5-pixel intensity of outer and inner boundary regions from the border of the annotated area.

To explore HTA distribution in the macula, we assessed the area per subfield using the Early Treatment Diabetic Retinopathy Study (ETDRS) grid. As reported in a previous study, the Spectralis OCT scan area is not captured consistently across different eyes [6]. To identify the scan area that was consistently captured across eyes, we calculated the proportion of completely captured scans for different fovea-centred rings. The 2 mm radius was the largest ring captured in most eyes (98%) (Table S1). Therefore, we modified the ETDRS outer ring to a 2 mm radius for this study.

If the foveal centre was outside the annotation, the proximity was a positive value, but if it was within the annotation, it was a negative value. For eyes with multiple HTA patches, the foveal proximity was defined as the minimal numerical value among the patch-level proximity values. The foveal involvement score represents the percentage of a fovea-centred circle occupied by HTAs. We calculated the foveal involvement scores for 4 circles with a radius of 0.5 mm, 1.0 mm, 1.5 mm, and 2.0 mm, respectively.

**References**

1 Gonzalez R & Woods R. 3.3.2 Histogram matching (specification). In: Gonzalez R, Woods R (eds). Digital Image Processing. 3rd edn. (Pearson Education, Inc., London, 2009) 128-138.

2. Mustafa W & Kader MMMA. A review of histogram equalization techniques in image enhancement application. *J Phys: Conf Ser* **1019**, 012026 (2018).

3. Liefers B, Venhuizen FG, Schreur V, van Ginneken B, Hoyng C, Fauser S *et al*. Automatic detection of the foveal center in optical coherence tomography. *Biomed Opt Express* **8**, 5160-5178 (2017).

4. Corradetti G, Au A, Borrelli E, Xu X, Freund KB & Sarraf D. Analysis of hyperreflective dots within the central fovea in healthy eyes using en face optical coherence tomography. *Invest Ophthalmol Vis Sci* **60**, 4451-4461 (2019).

5. Haralick R, Shanmugam K & Dinstein I. Textural features of image classification. *IEEE Trans Syst Man Cybern B Cybern* **3**, 610-621 (1973).

6. von Schulthess EL, Maunz A, Chakravarthy U, Holekamp N, Pauleikhoff D, Patel K *et al*. Intraretinal hyper-reflective foci are almost universally present and co-localize with intraretinal fluid in diabetic macular edema. *Invest Ophthalmol Vis Sci* **65**, 26 (2024).
